# Supplementary material
Source: PubMed Central journal article supplement (PMC5767872)
Supplement: supp_RA117.000380_133052_1_supp_25695_9zl9by.pdf [file supp_RA117.000380_133052_1_supp_25695_9zl9by.pdf]

**Supporting information for:**

**A hereditary spastic paraplegia–associated atlastin variant exhibits defective allosteric coupling in the catalytic core**

**John P. O’Donnell<sup>1</sup>, Laura J. Byrnes<sup>1,2</sup>, Richard B. Cooley<sup>1,3</sup>, and Holger Sondermann<sup>1,4,§</sup>**

<sup>1</sup>From the Department of Molecular Medicine, Cornell University, Ithaca, NY 14853, USA

<sup>2</sup>Present address: Worldwide Medicinal Chemistry, Pfizer, Eastern Point Rd, Groton, CT 06340, USA

<sup>3</sup>Present address: Department of Biochemistry and Biophysics, Oregon State University, Corvallis, OR 97331, USA

<sup>4</sup>Lead contact

<sup>§</sup>Correspondence: hs293@cornell.edu

**Content:**

**Figure S1 (associated with Figure 3).** Determination of nucleotide-dependent equilibrium and steady state dimerization of wild-type and F<sup>151</sup>S variants of ATL.

**Figure S2 (associated with Figure 5).** Novel ATL crystal packing and asymmetric contents of crystals containing ATL1-R<sup>77</sup>A bound to GDP•Mg<sup>2+</sup>.

**Figure S3 (associated with Figure 5).** Crystals containing ATL1-R<sup>77</sup>A/F<sup>151</sup>S bound to GDP•Mg<sup>2+</sup> exhibit the same crystal packing and asymmetric contents as seen for the ATL1-R<sup>77</sup>A structure.

**Figure S4 (associated with Figure 5).** Molecular weight determination indicates R77 involvement in nucleotide-dependent conformational changes of ATL1-F<sup>151</sup>S.

**Figure S5 (associated with Figure 5E).** Guanine cap electron densities.

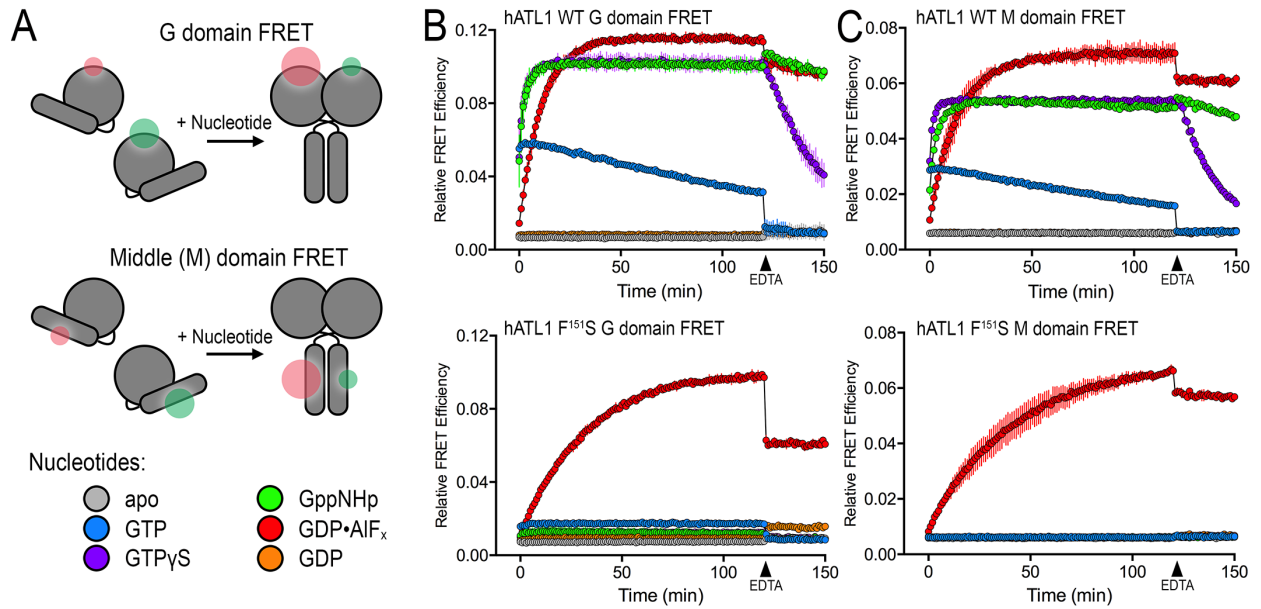

**Figure S1 (associated with Figure 3). Determination of nucleotide-dependent equilibrium and steady-state dimerization of wild-type and F<sup>151</sup>S variants of ATL.** (A) Donor- and acceptor-labeled proteins on either G or middle domain (1  $\mu$ M) were incubated with indicated nucleotides (500  $\mu$ M). After 120 minutes, EDTA (10 mM) was added, indicated by the arrow on the x-axis. (B) G domain FRET. (C) Middle domain FRET. Graphs showing means and standard deviation (SD) are plotted from two biological replicates with three technical repeats each.

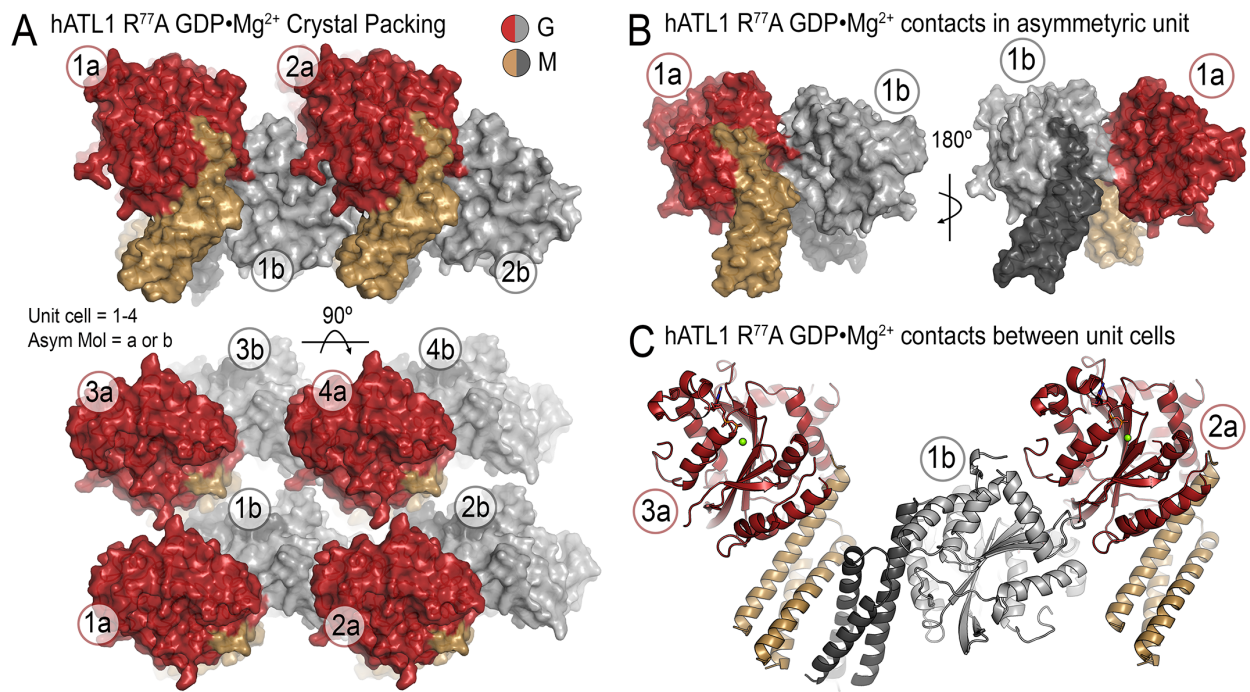

**Figure S2 (associated with Figure 5). Novel ATL crystal packing and asymmetric contents of crystals containing ATL1-R<sup>77</sup>A bound to GDP•Mg<sup>2+</sup>.** (A) Schematic of crystal packing and contacts made in the ATL1-R<sup>77</sup>A structure. Two protomers form a unit cell and their G domains are colored either red or light gray, and their middle domains are colored tan or dark gray. Each protomer is labeled with a number and letter corresponding to its position within the crystal lattice. (B) Asymmetric unit contents illustrate a novel contact between protomers. (C) Asymmetric units pack via middle domain-mediated (molecules 3a and 1b) and G domain-mediated (molecules 1b and 2a) contacts.

**A** hATL1 R<sup>77</sup>A/F<sup>151</sup>S GDP•Mg<sup>2+</sup> Crystal Packing

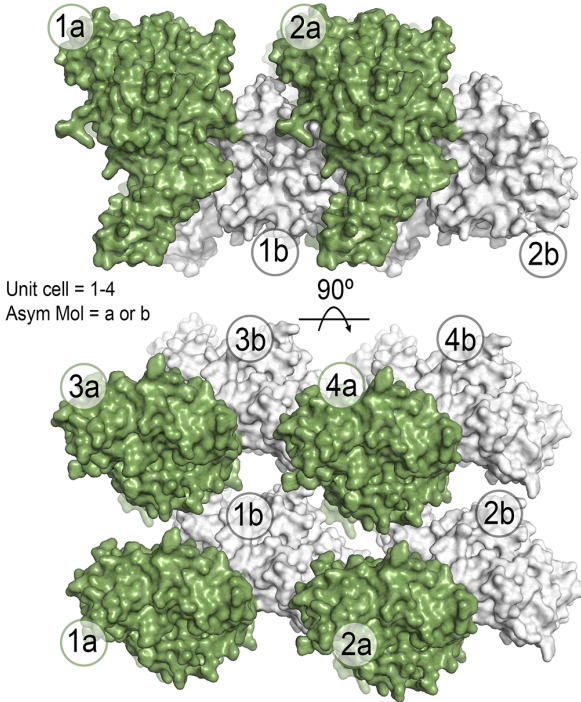

**B** hATL1 R<sup>77</sup>A/F<sup>151</sup>S GDP•Mg<sup>2+</sup> asymmetric unit contacts

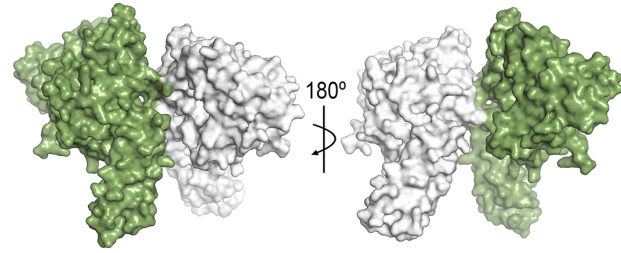

**C** hATL1 R<sup>77</sup>A/F<sup>151</sup>S GDP•Mg<sup>2+</sup> unit cell contacts

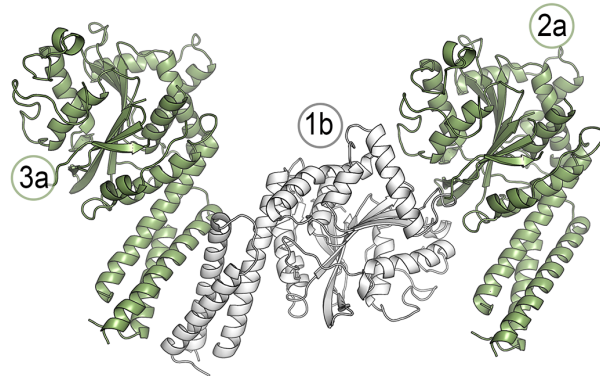

**Figure S3 (associated with Figure 5).** Crystals containing ATL1-R<sup>77</sup>A/F<sup>151</sup>S bound to GDP•Mg<sup>2+</sup> exhibit the same crystal packing and asymmetric contents as seen for the ATL1-R<sup>77</sup>A structure. **(A)** Crystal packing is the same as for the ATL1-R<sup>77</sup>A structure. Each protomer is labeled with a number and letter corresponding to its position within the crystal lattice, and colored either green or white. **(B)** Asymmetric unit contents mirrors the ATL1-R<sup>77</sup>A structure. **(C)** Crystal contacts made between asymmetric units are also consistent with ATL1-R<sup>77</sup>A structure.



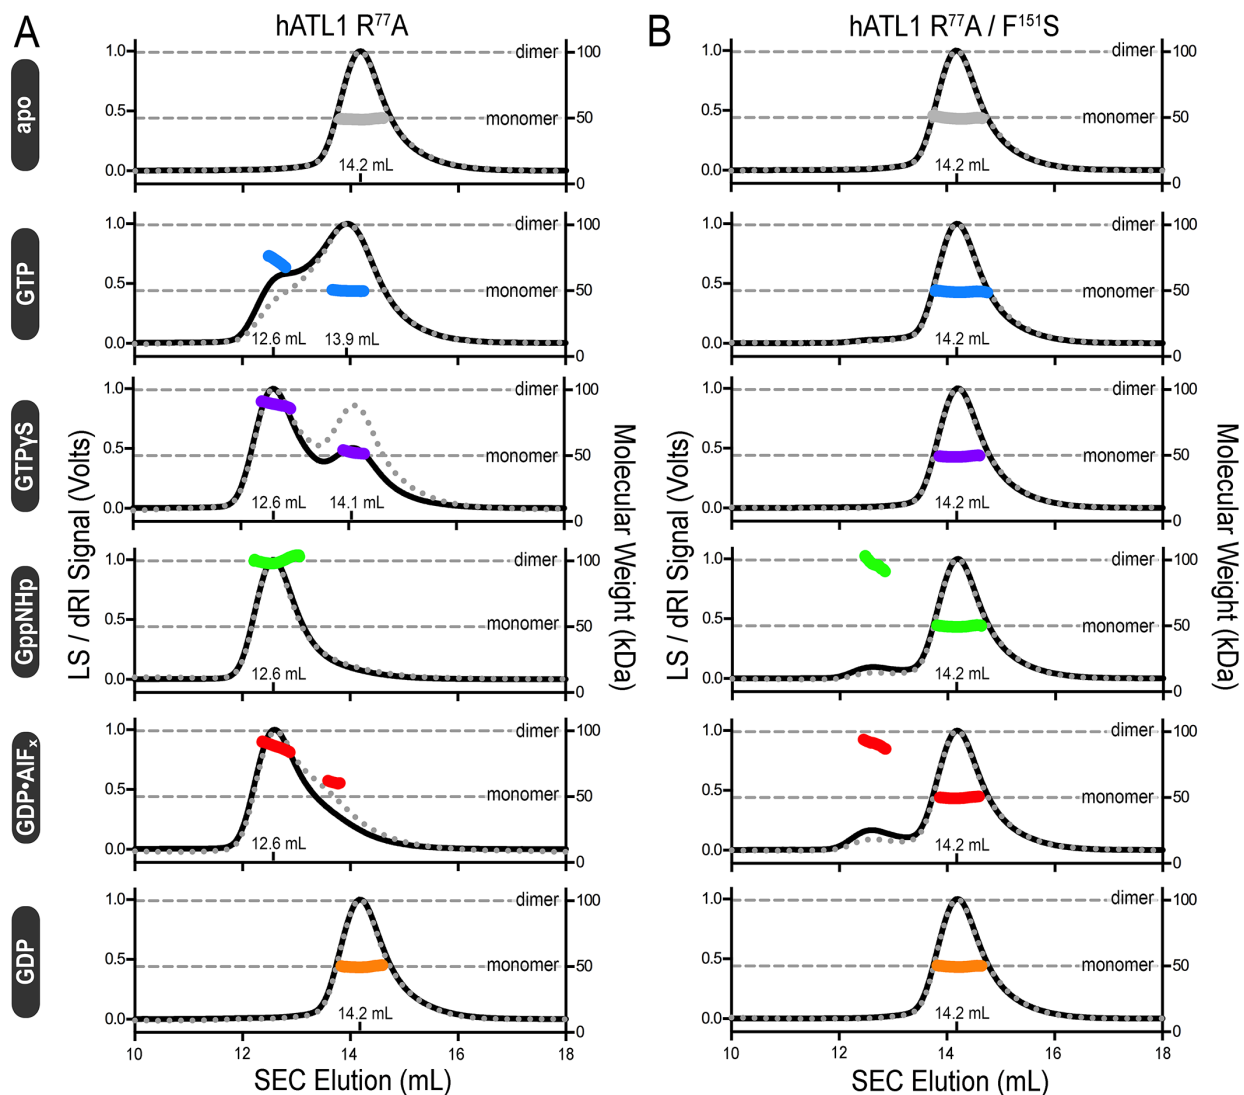

**Figure S4 (associated with Figure 5). Molecular weight determination indicates R77 involvement in nucleotide-dependent conformational changes of ATL1-F<sup>151</sup>S.** (A) Absolute molecular weights (colored data points across elution peaks are plotted on the right axis; theoretical monomer and dimer molecular weights, horizontal gray lines) of ATL-R<sup>77</sup>A catalytic core fragment (injection: 40  $\mu$ M  $\pm$  1 mM nucleotide) were determined using SEC-MALS (90°-light scattering, black solid, and refractive index signal, grey dotted, are plotted on the left axis). (B) SEC-MALS data for the corresponding ATL1-R<sup>77</sup>A/F<sup>151</sup>S construct using the same experimental conditions as in (A).

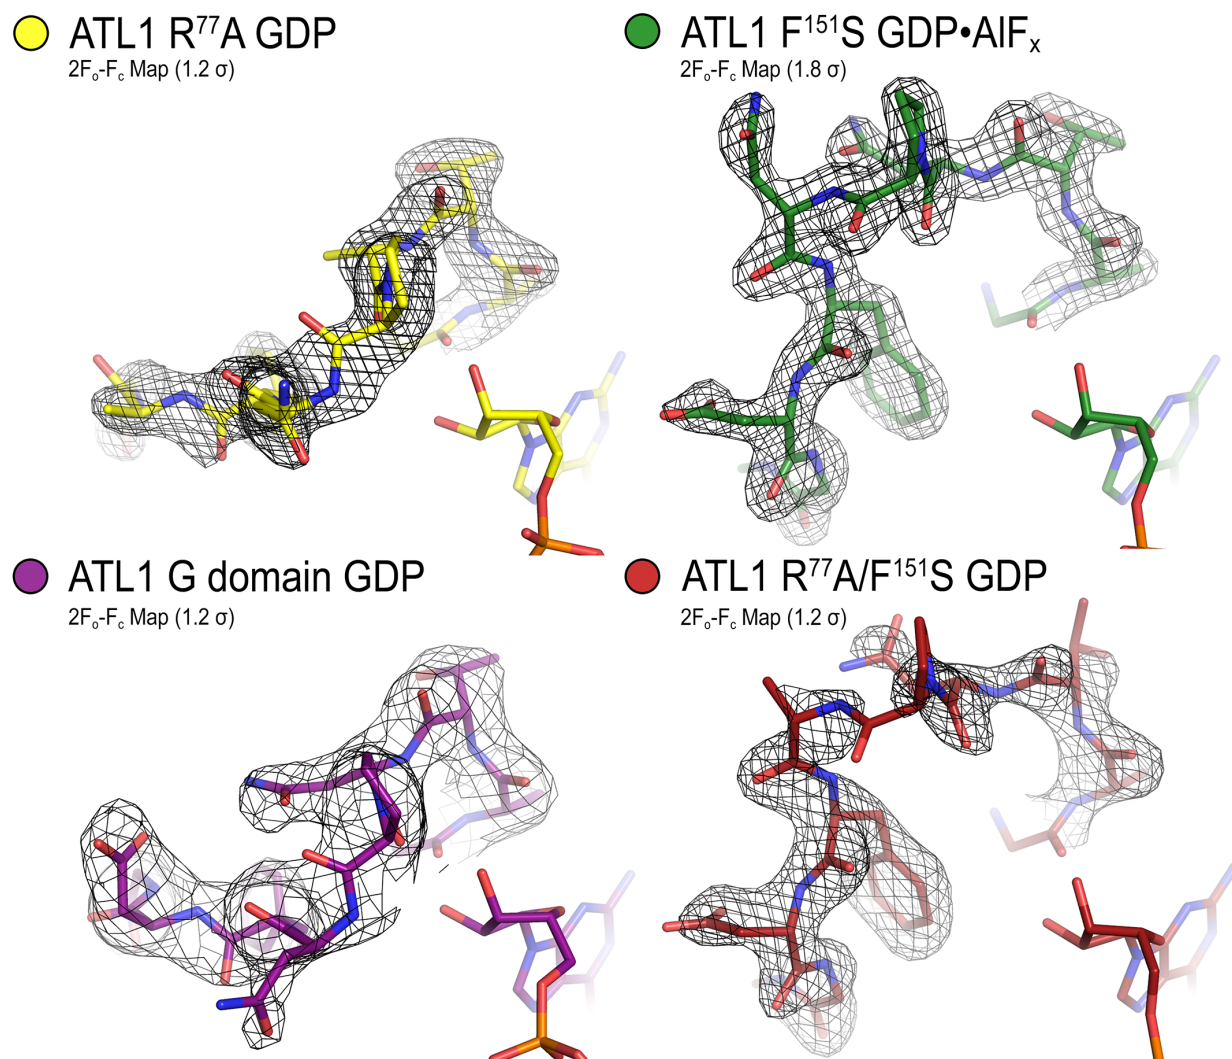

**Figure S5 (associated with Figure 5E). Guanine cap electron densities.** Electron densities (2F<sub>o</sub>-F<sub>c</sub>) for the guanine cap (residues 277-284) are depicted for ATL1-R<sup>77</sup>A bound to GDP (yellow, 1.2σ), ATL1-F<sup>151</sup>S bound to GDP•AlF<sub>4</sub><sup>-</sup> (green, 1.8σ), ATL1 G domain (1-339) bound to GDP (purple, 1.2σ), and ATL1-R<sup>77</sup>A/F<sup>151</sup>S bound to GDP (red, 1.2σ).
